# Supplementary material for: Genome-Wide Analysis of DNA Methylation Dynamics during Early Human Development
Source: PLoS Genet. 2014 Dec 11;10(12):e1004868. doi: 10.1371/journal.pgen.1004868 (PMC4263407; doi:10.1371/journal.pgen.1004868)
Supplement: S1 Table — DNA methylation levels of imprinted DMRs. DMRs are classified into four groups: Maternal gDMRs; oocyte-specific methylated gDMRs with 35–65% methylation levels in blood cells, Paternal gDMRs; sperm-specific methylated gDMRs with 35–65% methylation levels in blood cells, Placenta-specific maternal gDMRs; maternal gDMRs maintained only in the placenta, Secondary DMRs; DMRs other than gDMRs. For secondary DMRs, neighboring gDMRs are indicated. While the ZC3H12C and LIN28B DMRs are classified as secondary DMRs, these may be placenta-specific maternal gDMRs (the methylation levels in oocytes were 76.0% and 77.4%, respectively). (XLSX) [file pgen.1004868.s006.xlsx]

## Sheet: Table S1
Name	Chromosome	Start	End	Methylated allele	Oocyte (%)	Sperm (%)	Blastocyst (%)	H9-ES (%)	H1-ES (%)	HUES6-ES (%)	Blood (%)	Categoly
PPIEL	chr1	40024626	40025540	Maternal	87.4807	0	33.0215	58.9637	64.3639	78.3479	62.702	Maternal gDMR
DIRAS3-Ex2	chr1	68512505	68513486	Maternal	97.3107	3.2415	39.6433	75.6492	85.9261	95.0947	50.0459	Maternal gDMR
DIRAS3	chr1	68515433	68517545	Maternal	93.7021	0.63303	34.3791	74.186	69.0062	49.0706	55.899	Maternal gDMR
INPP5F	chr10	121578046	121578727	Maternal	92.5896	0.251883	33.6043	60.8464	62.4685	25.9452	53.936	Maternal gDMR
KvDMR1	chr11	2719948	2722259	Maternal	90.7634	0.394066	37.6417	41.9568	55.8709	47.2674	44.1299	Maternal gDMR
RB1	chr13	48892341	48895763	Maternal	94.9188	0.182711	39.7168	94.6031	86.5246	96.2157	51.2958	Maternal gDMR
SNURF	chr15	25200004	25201976	Maternal	93.2003	0.540263	40.49	37.5235	60.2229	43.9469	42.7076	Maternal gDMR
IGF1R	chr15	99408496	99409650	Maternal	94.6174	0.143876	33.9766	84.9326	79.9971	38.0212	43.1832	Maternal gDMR
ZNF597	chr16	3481801	3482388	Maternal	95.6982	0.292399	39.9322	94.7091	89.4856	92.9946	47.0067	Maternal gDMR
ZNF331	chr19	54040510	54042212	Maternal	95.1266	0.257434	39.5324	49.1014	69.7368	59.6679	42.7423	Maternal gDMR
ZNF331	chr19	54057086	54058425	Maternal	97.3893	0.621491	45.2562	95.1121	85.3666	79.5999	52.5465	Maternal gDMR
PEG3	chr19	57348493	57353271	Maternal	94.8512	0.638162	40.5463	87.5938	67.2995	35.8642	41.6854	Maternal gDMR
MCTS2	chr20	30134663	30135933	Maternal	86.6676	8.12349	37.95	59.5964	76.0952	75.4638	46.1804	Maternal gDMR
BLCAP	chr20	36148604	36150528	Maternal	94.7137	0.325559	38.3849	77.5255	75.7305	48.057	60.1234	Maternal gDMR
L3MBTL	chr20	42142365	42144040	Maternal	88.3066	0.523857	43.0484	42.1617	44.0634	48.978	44.5968	Maternal gDMR
NESP-AS	chr20	57425649	57428033	Maternal	95.3437	0.374909	39.8281	54.8205	27.3223	23.3055	43.7022	Maternal gDMR
GNAS-XL	chr20	57428905	57431463	Maternal	95.0973	0.41333	38.0851	42.8323	54.0471	49.7916	47.0354	Maternal gDMR
NHP2L1	chr22	42077774	42078873	Maternal	92.1861	0.416409	39.8124	50.5474	60.6284	48.8918	40.5211	Maternal gDMR
NAP1L5	chr4	89618184	89619237	Maternal	89.6612	0.222673	43.9255	49.2405	63.2076	61.725	48.7224	Maternal gDMR
FAM50B	chr6	3849082	3850359	Maternal	93.9141	0.435796	41.5026	45.8767	46.1696	54.1248	52.6701	Maternal gDMR
PLAGL1	chr6	144328078	144329888	Maternal	93.0736	0.467689	40.6723	44.0803	49.5538	34.6292	52.6956	Maternal gDMR
IGF2R	chr6	160426558	160427561	Maternal	96.9691	1.32981	48.0775	92.9767	75.361	88.1389	57.1343	Maternal gDMR
WDR27	chr6	170054504	170055618	Maternal	89.5778	4.30368	41.8758	71.8881	87.4327	59.735	55.6634	Maternal gDMR
GRB10	chr7	50848726	50851312	Maternal	86.6873	1.579	37.6372	50.7582	52.5235	60.2596	62.1372	Maternal gDMR
PEG10	chr7	94285537	94287960	Maternal	82.9101	0.487373	34.4228	46.8394	55.2419	56.1543	39.9634	Maternal gDMR
MEST	chr7	130130122	130134388	Maternal	89.9437	0.460875	40.2677	48.8492	67.5788	60.6343	50.3469	Maternal gDMR
HTR5A	chr7	154862719	154863382	Maternal	96.1798	0.258099	37.9346	84.9559	82.2701	82.7091	54.5151	Maternal gDMR
CXORF56	chr8	37604992	37606088	Maternal	96.4551	0.671157	32.8553	93.2893	90.7291	76.2638	45.6648	Maternal gDMR
TRAPPC9	chr8	141108147	141111081	Maternal	93.025	0.460075	42.0386	58.8263	75.9989	50.5371	47.5773	Maternal gDMR
H19	chr11	2018812	2024740	Paternal	6.02683	80.7005	36.2964	68.5561	74.7828	59.0361	52.1854	Paternal gDMR
IG-DMR	chr14	101275427	101278058	Paternal	6.0941	95.1291	38.0892	91.0557	86.1069	69.5202	60.5276	Paternal gDMR
FAM196A/DOCK1	chr10	128993405	128995242	Maternal	90.2128	0.343661	40.4264	2.01248	7.87684	1.69935	1.32515	Placenta-specific maternal gDMR
N4BP2L1	chr13	33000694	33002448	Maternal	80.8692	0.519553	36.0909	7.63709	13.7323	18.6418	3.38016	Placenta-specific maternal gDMR
RGMA	chr15	93614998	93616859	Maternal	92.9324	0.299822	36.8463	1.36484	6.45034	1.26721	1.12711	Placenta-specific maternal gDMR
FAM20A	chr17	66596155	66597643	Maternal	91.298	0.463775	44.5757	2.53631	8.59896	2.69048	1.65833	Placenta-specific maternal gDMR
ZNF396	chr18	32956510	32957580	Maternal	90.1829	0.24888	38.3439	3.56148	8.76175	6.06122	2.45472	Placenta-specific maternal gDMR
DNMT1	chr19	10303506	10306415	Maternal	86.2456	8.47843	35.7433	20.5231	30.0961	30.8889	12.5407	Placenta-specific maternal gDMR
MIR512-1cluster	chr19	54150515	54155608	Maternal	95.8355	17.3097	42.1952	94.6217	89.3416	95.745	93.7357	Placenta-specific maternal gDMR
GPR1-AS	chr2	207066967	207069445	Maternal	93.5682	5.2307	37.4133	89.6794	86.2568	94.7399	86.3284	Placenta-specific maternal gDMR
MCCC1	chr3	182815725	182817627	Maternal	95.1513	0.880701	40.6114	25.2932	30.0627	33.6069	25.7797	Placenta-specific maternal gDMR
PDE4D	chr5	58333774	58336554	Maternal	83.9824	0.42699	37.8797	9.06269	13.8473	16.5568	1.73978	Placenta-specific maternal gDMR
AIM1	chr6	106957945	106961974	Maternal	92.5126	0.991027	40.035	4.88318	9.3062	6.2631	0.864263	Placenta-specific maternal gDMR
AGBL3	chr7	134671024	134672011	Maternal	96.9497	0.448111	37.6907	2.8883	6.61081	5.41667	0.293722	Placenta-specific maternal gDMR
ZFAT	chr8	135707227	135710114	Maternal	81.3281	1.03881	38.8421	93.1545	78.5198	94.0423	91.6268	Placenta-specific maternal gDMR
GLIS3	chr9	4297279	4300182	Maternal	85.3296	0.408711	40.25	2.25595	7.28524	2.17496	0.606186	Placenta-specific maternal gDMR
DCAF10	chr9	37800140	37802937	Maternal	89.913	0.563948	38.8285	13.0846	18.127	23.1638	12.3995	Placenta-specific maternal gDMR
IGF2-DMR2	chr11	2153991	2155112	Paternal	71.3426	93.2035	11.2237	79.5853	71.3827	77.122	61.8834	Secondary DMR (associated with H19 gDMR)
IGF2-DMR0	chr11	2168333	2169768	Paternal	6.5316	92.946	4.4864	69.4639	53.3387	68.9904	42.0654	Secondary DMR (associated with H19 gDMR)
ZC3H12C	chr11	109962727	109964784	Maternal	76.0413	0.531201	37.6934	2.97442	9.46008	7.39705	2.50152	Secondary DMR (maybe placenta-specific maternal gDMR)
MEG3	chr14	101290524	101293978	Paternal	2.44414	0.62407	0.927009	90.4056	83.5345	70.8605	50.5109	Secondary DMR (associated with IG-DMR)
MEG8	chr14	101370741	101371419	Maternal	2.25806	0.159221	0.783071	5.19701	8.82967	14.4333	51.9817	Secondary DMR (associated with IG-DMR)
MKRN3	chr15	23807086	23812495	Maternal	57.61	11.523	11.8748	89.4929	83.2403	88.7863	76.0805	Secondary DMR (associated with SNURF gDMR)
MAGEL2	chr15	23892425	23894029	Maternal	6.91489	1.64864	2.66445	44.9496	52.7147	58.4515	56.9873	Secondary DMR (associated with SNURF gDMR)
NDN	chr15	23931451	23932759	Maternal	10.556	0.45611	0.94825	49.4168	51.2407	57.2834	40.051	Secondary DMR (associated with SNURF gDMR)
SNRPN-CpG32	chr15	24346736	24347142	Maternal	4.16667	0.601251	0.516937	50.162	62.206	43.684	23.5969	Secondary DMR (associated with SNURF gDMR)
SNRPN-CpG29	chr15	24671872	24672679	Maternal	15.5824	0.351517	4.61391	43.6779	63.3211	59.3687	29.3015	Secondary DMR (associated with SNURF gDMR)
SNRPN-CpG30	chr15	24722753	24723071	Maternal	73.9954	0.560224	8.08785	51.3748	59.8316	1.81818	22.7477	Secondary DMR (associated with SNURF gDMR)
SNRPN-CpG40	chr15	25017924	25018886	Maternal	0.879433	0.489211	1.0925	43.8205	83.6519	52.0905	36.8426	Secondary DMR (associated with SNURF gDMR)
SNRPN	chr15	25068564	25069481	Maternal	2.5	2.33252	1.88829	32.2699	25.4264	39.242	52.0775	Secondary DMR (associated with SNURF gDMR)
SNRPN	chr15	25093008	25093829	Maternal	12.4684	0.26561	0.781631	51.1895	50.4888	51.07	37.5568	Secondary DMR (associated with SNURF gDMR)
SNRPN	chr15	25123027	25123905	Maternal	1.89895	0.523263	0.543458	88.7685	85.2851	87.8035	37.8113	Secondary DMR (associated with SNURF gDMR)
ZNF597/NAA60	chr16	3492828	3494463	Paternal	0.469484	0.435134	0.566079	48.4207	56.5374	49.858	37.3367	Secondary DMR (associated with SNURF gDMR)
ZDBF2	chr2	207114583	207136544	Paternal	5.85301	44.5074	4.49788	87.3923	62.2374	53.5617	49.8995	Secondary DMR (associated with GPR1-AS gDMR)
GNAS	chr20	57414039	57418612	Paternal	14.6918	0.926	2.66966	43.7394	55.4803	55.2337	51.4319	Secondary DMR (associated with NESP-AS and GNAS-XL gDMRs)
GNAS-Ex1A	chr20	57463265	57465201	Maternal	11.7817	0.50579	3.72891	18.5421	29.7726	10.196	42.8723	Secondary DMR (associated with NESP-AS and GNAS-XL gDMRs)
WRB	chr21	40757510	40758276	Maternal	17.4764	0.454259	37.7155	90.1267	84.705	96.2879	55.6217	Secondary DMR (associated wit no known gDMR)
LIN28B	chr6	105400631	105402559	Maternal	77.4446	1.90197	32.4003	2.63889	4.26089	1.92839	5.85191	Secondary DMR (maybe placenta-specific maternal gDMR)
