# Supplementary material for: Genome-Wide Analysis of DNA Methylation Dynamics during Early Human Development
Source: PLoS Genet. 2014 Dec 11;10(12):e1004868. doi: 10.1371/journal.pgen.1004868 (PMC4263407; doi:10.1371/journal.pgen.1004868)
Supplement: S3 Table — DNA methylation levels of repeat sequences. We analyzed SINEs, LINEs, LTRs, DNA repeats, SVAs and satellites with>100 copies in the human genome. Mean methylation levels of CpGs are shown. (XLSX) [file pgen.1004868.s008.xlsx]

## Sheet: Table S3
Name	Class	Family	Oocyte (%)	Sperm (%)	Blastocyst (%)	ES (%)	Blood (%)
Eulor9A	DNA	DNA repeat	70.8863	90.2124	30.9458	86.4831	76.6685
Eulor9C	DNA	DNA repeat	60.1825	69.6897	25.462	71.7835	66.2943
MER105	DNA	DNA repeat	66.0708	84.876	29.6458	87.2506	80.632
MER107	DNA	DNA repeat	56.164	81.8485	24.388	85.2119	71.9816
MER125	DNA	DNA repeat	49.5953	84.1087	26.3017	86.8355	83.0097
MER126	DNA	DNA repeat	55.1323	80.5832	25.8322	81.0259	77.4179
MER135	DNA	DNA repeat	53.4463	84.7106	25.6191	84.4138	79.8496
MamRep1894	hAT	DNA repeat	54.5013	87.2424	26.127	88.9075	83.3104
MamRep38	hAT	DNA repeat	49.1653	87.6151	23.4396	85.3498	80.6606
MamRep488	hAT	DNA repeat	53.8776	78.8424	19.3966	79.5317	76.3805
MER53	hAT	DNA repeat	45.58	79.8724	20.9274	84.4616	77.8799
MER96	hAT	DNA repeat	51.2222	84.7336	23.1348	83.415	79.3758
MER96B	hAT	DNA repeat	46.1388	76.0222	21.6893	83.9359	78.2724
MamRep1879	hAT?	DNA repeat	44.9123	72.8801	20.5668	74.7307	71.397
MamRep4096	hAT?	DNA repeat	41.5309	80.1632	19.3812	84.9045	77.4818
MER99	hAT?	DNA repeat	59.0653	87.5381	28.8898	88.2115	82.9117
BLACKJACK	hAT-Blackjack	DNA repeat	49.0724	84.0778	27.1163	88.1321	81.8392
MER63A	hAT-Blackjack	DNA repeat	53.4745	87.4321	25.227	87.6285	82.5052
MER63B	hAT-Blackjack	DNA repeat	51.9548	85.3755	24.0109	87.7196	81.6987
MER63C	hAT-Blackjack	DNA repeat	51.7437	86.1668	26.9202	88.4918	83.2104
MER63D	hAT-Blackjack	DNA repeat	52.5381	82.9408	24.4267	88.4953	80.9791
MER81	hAT-Blackjack	DNA repeat	50.1745	85.99	21.3034	85.3399	79.9928
MER94	hAT-Blackjack	DNA repeat	56.6185	86.3511	26.2036	87.2454	80.8916
MER94B	hAT-Blackjack	DNA repeat	46.444	83.8349	20.5035	87.0108	78.1548
Charlie1	hAT-Charlie	DNA repeat	63.0486	85.5287	30.8587	88.6327	83.5563
Charlie10	hAT-Charlie	DNA repeat	57.8628	86.8694	28.4636	89.129	83.361
Charlie10a	hAT-Charlie	DNA repeat	69.2478	89.0126	30.7612	88.2255	82.8247
Charlie10b	hAT-Charlie	DNA repeat	61.9818	84.8118	29.1618	89.3267	80.9878
Charlie11	hAT-Charlie	DNA repeat	64.0225	86.725	28.8336	89.2092	83.6792
Charlie13a	hAT-Charlie	DNA repeat	53.5948	83.515	26.1912	85.8904	78.7246
Charlie13b	hAT-Charlie	DNA repeat	47.9201	89.0871	22.5118	86.3104	81.9424
Charlie14a	hAT-Charlie	DNA repeat	54.6655	81.073	27.262	90.1505	84.7687
Charlie15a	hAT-Charlie	DNA repeat	60.0342	88.6399	25.1166	86.5013	79.6912
Charlie16a	hAT-Charlie	DNA repeat	56.7727	84.8758	24.923	85.8839	80.0782
Charlie17a	hAT-Charlie	DNA repeat	60.4755	88.0947	28.5618	87.2312	82.9794
Charlie18a	hAT-Charlie	DNA repeat	55.5056	86.1459	24.9528	86.8517	81.7164
Charlie19a	hAT-Charlie	DNA repeat	56.7746	84.9973	24.7222	86.921	80.5614
Charlie1a	hAT-Charlie	DNA repeat	65.0117	84.7864	32.3277	89.1288	84.1681
Charlie1b	hAT-Charlie	DNA repeat	59.1211	83.8824	28.0368	88.0639	83.5884
Charlie20a	hAT-Charlie	DNA repeat	55.8412	89.1991	26.801	87.5719	81.2812
Charlie21a	hAT-Charlie	DNA repeat	62.2734	83.0257	28.6902	88.1868	82.0157
Charlie22a	hAT-Charlie	DNA repeat	58.0553	87.6722	25.2596	88.3776	83.1872
Charlie23a	hAT-Charlie	DNA repeat	58.8166	85.775	27.2336	87.5965	82.9455
Charlie24	hAT-Charlie	DNA repeat	59.0573	85.1578	28.5643	88.313	81.8815
Charlie25	hAT-Charlie	DNA repeat	56.1098	84.489	28.2544	88.0441	82.2882
Charlie26a	hAT-Charlie	DNA repeat	52.9627	83.5532	25.5935	87.3725	81.7732
Charlie2a	hAT-Charlie	DNA repeat	54.7754	82.9948	27.4304	86.893	81.6018
Charlie2b	hAT-Charlie	DNA repeat	55.6906	82.0223	26.6647	86.4308	81.8492
Charlie3	hAT-Charlie	DNA repeat	55.2536	84.8083	27.3271	89.1129	83.5239
Charlie4	hAT-Charlie	DNA repeat	54.6435	83.7532	26.0366	88.0137	75.4264
Charlie4a	hAT-Charlie	DNA repeat	52.5898	83.5006	24.8877	86.3357	79.5566
Charlie4z	hAT-Charlie	DNA repeat	57.4093	82.4399	25.3661	84.782	80.1642
Charlie5	hAT-Charlie	DNA repeat	55.2285	80.2338	27.0547	86.7288	82.7604
Charlie6	hAT-Charlie	DNA repeat	54.9321	79.7247	27.9282	87.871	80.1253
Charlie7	hAT-Charlie	DNA repeat	57.3029	85.3088	27.7102	88.3888	82.4135
Charlie7a	hAT-Charlie	DNA repeat	59.0961	87.649	28.8312	88.0086	82.9062
Charlie8	hAT-Charlie	DNA repeat	55.8335	83.7785	24.3892	85.7538	80.6344
Charlie9	hAT-Charlie	DNA repeat	59.99	82.5638	28.2295	87.4924	80.7652
Cheshire	hAT-Charlie	DNA repeat	63.5551	83.7897	34.4595	89.1878	84.6631
MER102a	hAT-Charlie	DNA repeat	57.9008	87.5272	24.6487	85.8879	81.5247
MER102b	hAT-Charlie	DNA repeat	56.1875	86.5717	24.3045	85.7257	81.4582
MER102c	hAT-Charlie	DNA repeat	56.7371	87.774	24.5322	87.0393	82.3164
MER103C	hAT-Charlie	DNA repeat	58.1227	86.6384	26.1545	87.3764	81.7694
MER106A	hAT-Charlie	DNA repeat	63.1607	83.628	27.681	86.6484	81.3493
MER106B	hAT-Charlie	DNA repeat	61.4196	84.5242	28.796	87.142	83.3302
MER112	hAT-Charlie	DNA repeat	58.6691	83.0742	26.4392	86.3338	79.5382
MER113	hAT-Charlie	DNA repeat	51.8973	84.2019	21.8423	85.8819	78.5542
MER113A	hAT-Charlie	DNA repeat	53.9132	85.9317	23.8433	86.2481	81.1103
MER113B	hAT-Charlie	DNA repeat	57.3208	83.5434	24.424	86.3938	80.6653
MER117	hAT-Charlie	DNA repeat	56.5039	89.1713	25.3878	87.2406	81.9002
MER119	hAT-Charlie	DNA repeat	60.5812	84.0076	29.0329	86.0903	78.3129
MER1A	hAT-Charlie	DNA repeat	64.7251	87.0287	30.1903	87.9722	86.7925
MER1B	hAT-Charlie	DNA repeat	64.168	82.9432	30.8889	87.229	87.0913
MER20	hAT-Charlie	DNA repeat	59.2214	85.0042	26.3659	84.9659	79.0872
MER20B	hAT-Charlie	DNA repeat	56.4341	84.2336	26.0935	85.5007	80.3892
MER3	hAT-Charlie	DNA repeat	61.6139	87.4318	28.3352	88.1706	83.3755
MER30	hAT-Charlie	DNA repeat	62.0817	87.1128	30.8908	88.8799	86.2831
MER30B	hAT-Charlie	DNA repeat	61.877	82.4924	28.332	86.7122	80.4849
MER33	hAT-Charlie	DNA repeat	58.3619	84.2228	27.4018	87.8725	82.7247
MER58A	hAT-Charlie	DNA repeat	64.2972	86.6898	28.8546	88.4871	82.8272
MER58B	hAT-Charlie	DNA repeat	60.3348	86.6137	28.0466	88.0197	82.0954
MER58C	hAT-Charlie	DNA repeat	65.3469	86.6582	29.5979	87.7052	81.8884
MER58D	hAT-Charlie	DNA repeat	61.218	83.9942	28.1393	88.7851	82.6699
MER5A	hAT-Charlie	DNA repeat	48.8882	83.2327	22.1812	83.1248	80.1058
MER5A1	hAT-Charlie	DNA repeat	48.6655	84.7658	22.4744	82.9714	81.3232
MER5B	hAT-Charlie	DNA repeat	46.1892	83.6267	21.2064	84.5882	81.0525
MER5C	hAT-Charlie	DNA repeat	55.9832	85.4063	27.6423	87.7335	83.0885
MER5C1	hAT-Charlie	DNA repeat	61.8453	83.9789	28.0816	88.8723	82.296
Arthur1	hAT-Tip100	DNA repeat	48.1878	85.716	24.8388	88.4827	81.3702
Arthur1A	hAT-Tip100	DNA repeat	48.3732	81.7078	22.4659	84.3508	79.9859
Arthur1B	hAT-Tip100	DNA repeat	48.524	86.1364	24.4618	88.0736	80.8351
Arthur1C	hAT-Tip100	DNA repeat	45.0073	82.301	22.1472	84.8831	75.4283
FordPrefect	hAT-Tip100	DNA repeat	48.9567	83.836	26.863	85.4674	80.329
FordPrefect_a	hAT-Tip100	DNA repeat	48.7509	72.2472	20.3597	83.5504	76.2154
MER115	hAT-Tip100	DNA repeat	50.2201	85.3029	22.9222	87.0062	82.243
MER45A	hAT-Tip100	DNA repeat	47.5451	84.3357	21.9965	86.557	80.9141
MER45B	hAT-Tip100	DNA repeat	48.7645	84.6852	24.9128	87.0812	78.5249
MER45C	hAT-Tip100	DNA repeat	47.3456	82.7867	22.5339	85.6221	80.8607
MER45R	hAT-Tip100	DNA repeat	49.4619	79.2982	23.5017	87.7057	80.6923
MER91A	hAT-Tip100	DNA repeat	52.6735	85.4764	22.5569	84.1928	79.1756
MER91B	hAT-Tip100	DNA repeat	53.6048	87.3175	23.4046	81.4192	74.4499
MER91C	hAT-Tip100	DNA repeat	54.402	86.3694	24.5601	80.8796	78.2037
MER97a	hAT-Tip100	DNA repeat	42.9469	87.0642	21.9506	86.8616	81.5195
MER97b	hAT-Tip100	DNA repeat	36.7704	82.8967	22.087	87.9032	80.7416
MER97c	hAT-Tip100	DNA repeat	41.5432	77.7288	21.7209	87.4578	82.8561
MER97d	hAT-Tip100	DNA repeat	58.4281	89.3388	28.9568	85.7015	81.1824
ORSL	hAT-Tip100	DNA repeat	45.1109	79.2333	22.9661	84.9114	80.1484
ORSL-2a	hAT-Tip100	DNA repeat	45.7534	72.1715	18.442	83.701	77.4198
ORSL-2b	hAT-Tip100	DNA repeat	49.8715	76.1317	21.7944	84.6459	79.0368
Zaphod	hAT-Tip100	DNA repeat	48.8229	82.9543	24.6567	87.5427	82.3495
Zaphod2	hAT-Tip100	DNA repeat	51.4552	85.6498	24.8429	86.7015	80.6038
Zaphod3	hAT-Tip100	DNA repeat	47.4611	85.2601	25.4683	88.0803	82.6409
Ricksha	MuDR	DNA repeat	58.0161	88.559	30.0394	88.2135	83.3961
Ricksha_0	MuDR	DNA repeat	51.8275	86.6931	30.1608	88.8438	84.5534
Ricksha_b	MuDR	DNA repeat	63.917	91.2208	30.9794	89.803	85.5545
Ricksha_c	MuDR	DNA repeat	59.7662	88.1721	28.4494	87.6638	83.7907
Looper	PiggyBac	DNA repeat	71.2065	88.7277	38.1116	90.6104	83.2371
MER75	PiggyBac	DNA repeat	56.2352	79.0591	30.9628	90.031	84.2632
MER75B	PiggyBac	DNA repeat	63.8208	77.0493	27.9809	89.0232	82.1722
MER85	PiggyBac	DNA repeat	55.9488	78.9621	27.6649	89.7099	86.423
UCON29	PiggyBac?	DNA repeat	52.9041	84.4378	25.1797	80.3079	77.0184
DNA1_Mam	TcMar	DNA repeat	47.2645	86.446	22.8987	88.8	82.5684
MamRep1161	TcMar	DNA repeat	58.1862	82.4594	24.747	83.7852	76.1955
Eulor8	TcMar?	DNA repeat	54.0262	78.5727	27.474	82.1964	78.2641
MamRep137	TcMar?	DNA repeat	63.8139	88.0266	28.6895	88.1954	83.6424
MER121	TcMar?	DNA repeat	43.5261	84.6857	20.5115	86.695	72.7153
HSMAR1	TcMar-Mariner	DNA repeat	47.5616	73.3477	28.3202	90.598	85.7988
HSMAR2	TcMar-Mariner	DNA repeat	58.3543	81.7183	30.6208	88.1608	83.2762
MADE1	TcMar-Mariner	DNA repeat	51.1667	78.5407	28.424	89.1814	84.6427
MADE2	TcMar-Mariner	DNA repeat	57.5347	82.8979	25.7368	86.7883	80.5149
MARNA	TcMar-Mariner	DNA repeat	60.237	86.86	27.0787	88.2906	82.5216
Kanga1	TcMar-Tc2	DNA repeat	55.0607	85.7578	29.0676	88.0332	83.822
Kanga11a	TcMar-Tc2	DNA repeat	59.681	85.6433	28.9628	88.4438	82.6674
Kanga1a	TcMar-Tc2	DNA repeat	56.8264	87.3447	28.8554	88.6985	83.5227
Kanga1b	TcMar-Tc2	DNA repeat	53.428	86.533	26.9632	86.6507	81.1429
Kanga1c	TcMar-Tc2	DNA repeat	59.7615	86.7573	30.227	89.1009	83.5581
Kanga1d	TcMar-Tc2	DNA repeat	52.5892	85.4007	26.8052	87.8857	83.5258
Kanga2_a	TcMar-Tc2	DNA repeat	60.793	87.013	29.6357	88.9461	84.0436
MER104	TcMar-Tc2	DNA repeat	59.7327	84.982	27.8312	88.9483	83.3186
MamRep434	TcMar-Tigger	DNA repeat	54.6837	86.4482	24.1771	85.7609	79.0541
MER127	TcMar-Tigger	DNA repeat	65.9896	83.091	27.6487	86.0888	74.448
MER2	TcMar-Tigger	DNA repeat	65.5753	86.0246	32.3352	89.0856	85.8924
MER2B	TcMar-Tigger	DNA repeat	62.567	85.7799	32.1027	89.3235	86.7556
MER44A	TcMar-Tigger	DNA repeat	63.9158	86.0732	31.8374	89.5568	81.0984
MER44B	TcMar-Tigger	DNA repeat	63.6777	87.1965	32.1815	90.0887	84.4412
MER44C	TcMar-Tigger	DNA repeat	63.8791	86.0873	32.7976	89.0037	83.6278
MER44D	TcMar-Tigger	DNA repeat	59.2177	88.7988	33.6616	90.3951	84.7348
MER46C	TcMar-Tigger	DNA repeat	60.4255	85.3654	26.3371	87.3272	82.0404
MER47A	TcMar-Tigger	DNA repeat	60.9534	88.3664	30.4628	89.5905	85.877
MER47B	TcMar-Tigger	DNA repeat	64.1807	87.8356	32.0183	89.7859	86.9665
MER47C	TcMar-Tigger	DNA repeat	56.7967	76.9552	27.8696	86.6432	81.751
MER6	TcMar-Tigger	DNA repeat	58.2076	83.2117	28.5657	89.6898	84.7757
MER6A	TcMar-Tigger	DNA repeat	55.9727	83.2332	27.6114	89.2734	85.089
MER6B	TcMar-Tigger	DNA repeat	66.4114	81.1652	29.7706	89.3225	83.3742
MER6C	TcMar-Tigger	DNA repeat	65.6713	86.3431	33.5107	92.4361	84.6952
MER8	TcMar-Tigger	DNA repeat	67.3511	86.4892	33.7519	89.6835	87.3178
MER82	TcMar-Tigger	DNA repeat	59.2362	87.2244	30.4034	89.0486	84.7645
MERX	TcMar-Tigger	DNA repeat	56.1511	83.2864	28.7372	86.5131	80.6728
Tigger1	TcMar-Tigger	DNA repeat	64.1086	87.8799	32.4028	89.0057	83.2371
Tigger10	TcMar-Tigger	DNA repeat	68.4927	86.3031	31.3237	88.5136	81.6546
Tigger11a	TcMar-Tigger	DNA repeat	65.2757	86.4018	26.63	88.0941	81.4161
Tigger12	TcMar-Tigger	DNA repeat	67.3561	86.5758	31.7962	88.698	82.9391
Tigger12A	TcMar-Tigger	DNA repeat	62.8239	90.1051	30.41	87.5985	82.0955
Tigger12c	TcMar-Tigger	DNA repeat	63.7128	89.2967	29.2615	87.7505	83.4474
Tigger13a	TcMar-Tigger	DNA repeat	60.1076	87.7972	28.5353	88.4528	82.8553
Tigger14a	TcMar-Tigger	DNA repeat	58.856	89.988	28.3145	89.0885	83.4203
Tigger15a	TcMar-Tigger	DNA repeat	60.4308	86.4993	26.9077	87.4443	80.3682
Tigger16a	TcMar-Tigger	DNA repeat	59.2894	85.3094	24.6586	83.2684	76.6579
Tigger16b	TcMar-Tigger	DNA repeat	66.2775	85.8852	28.9362	86.9763	82.5379
Tigger1a_Art	TcMar-Tigger	DNA repeat	63.2892	88.7609	33.0852	89.2004	86.1196
Tigger2	TcMar-Tigger	DNA repeat	63.7496	85.8794	31.417	88.3378	81.7565
Tigger2a	TcMar-Tigger	DNA repeat	59.6695	87.0787	29.4093	88.3688	83.218
Tigger2b	TcMar-Tigger	DNA repeat	58.6541	91.8746	31.1271	86.6822	86.0098
Tigger2b_Pri	TcMar-Tigger	DNA repeat	63.6851	85.7647	31.6936	89.3202	84.527
Tigger3	TcMar-Tigger	DNA repeat	62.409	83.8531	31.3608	89.2217	83.5827
Tigger3a	TcMar-Tigger	DNA repeat	64.3658	87.2601	32.4172	90.1421	84.4068
Tigger3b	TcMar-Tigger	DNA repeat	62.0881	87.2002	32.6272	89.9528	85.4476
Tigger3c	TcMar-Tigger	DNA repeat	63.5368	86.4799	32.0304	90.0126	84.3008
Tigger3d	TcMar-Tigger	DNA repeat	68.2723	85.5518	34.7231	88.6398	83.9261
Tigger4	TcMar-Tigger	DNA repeat	59.4178	86.7162	32.2525	88.9903	83.5565
Tigger4a	TcMar-Tigger	DNA repeat	74.607	89.2535	35.7926	89.5276	87.8835
Tigger4b	TcMar-Tigger	DNA repeat	70.4035	88.5049	34.6363	88.8506	85.786
Tigger5	TcMar-Tigger	DNA repeat	61.6143	87.3937	31.0455	88.9985	84.574
Tigger6a	TcMar-Tigger	DNA repeat	62.1857	82.057	29.3755	89.2738	81.0678
Tigger6b	TcMar-Tigger	DNA repeat	61.1533	83.4034	30.4712	88.0147	81.4703
Tigger7	TcMar-Tigger	DNA repeat	59.7283	86.2457	30.381	89.3213	83.0026
Tigger8	TcMar-Tigger	DNA repeat	60.942	84.754	28.9247	86.9106	80.9331
Tigger9a	TcMar-Tigger	DNA repeat	60.7047	84.1406	28.3316	87.2599	81.3373
Tigger9b	TcMar-Tigger	DNA repeat	66.9371	83.4294	30.6808	89.049	79.723
CR1_Mam	CR1	LINE	59.3578	88.2625	27.7645	87.5188	79.9769
L3	CR1	LINE	57.8125	86.9382	25.9694	86.9966	80.1475
L3b	CR1	LINE	53.114	85.8029	23.3476	85.2961	77.7382
Plat_L3	CR1	LINE	53.3565	87.7537	24.5125	86.525	77.3501
X5A_LINE	CR1	LINE	49.0863	91.1076	25.0706	89.3127	84.1448
X6A_LINE	CR1	LINE	58.6569	83.6836	27.1551	86.7105	80.2004
X6B_LINE	CR1	LINE	57.6887	80.8719	27.5619	85.1736	76.6389
X7A_LINE	CR1	LINE	54.132	87.1602	24.5386	85.0693	75.9421
X7B_LINE	CR1	LINE	55.2184	86.8545	24.9453	85.915	80.4525
X7C_LINE	CR1	LINE	67.4803	85.1833	25.7609	86.5581	80.0262
X8_LINE	CR1	LINE	54.0153	86.0516	24.5047	87.95	79.318
Mam_R4	Dong-R4	LINE	52.4197	89.0775	25.3056	87.3842	81.7797
HAL1	L1	LINE	61.4435	86.371	28.5876	87.7596	81.4713
HAL1-2a_MD	L1	LINE	57.9639	82.6916	47.5607	79.7559	80.295
HAL1-3A_ME	L1	LINE	54.0785	72.1598	24.7282	76.8317	73.6967
HAL1b	L1	LINE	57.7884	84.1286	28.3043	87.942	80.581
L1HS	L1	LINE	61.3155	79.7331	39.4362	80.9758	84.5952
L1M	L1	LINE	66.2083	82.6916	28.5883	87.1304	82.0742
L1M1	L1	LINE	63.2546	83.6979	35.3812	86.1751	80.7467
L1M2	L1	LINE	63.9488	82.4803	36.68	85.8856	80.7075
L1M2a	L1	LINE	65.8182	86.3604	37.1949	86.6769	82.7975
L1M2a1	L1	LINE	64.8452	85.7341	35.5877	87.8372	81.6073
L1M2b	L1	LINE	67.0782	82.368	36.1325	85.0097	83.1375
L1M2c	L1	LINE	67.7552	87.9067	40.3511	87.1456	83.9878
L1M3	L1	LINE	59.5948	82.8691	31.0185	87.1656	81.6831
L1M3a	L1	LINE	70.9258	84.4629	38.471	85.3384	82.4932
L1M3b	L1	LINE	62.0976	81.1908	37.2584	86.1642	80.8351
L1M3c	L1	LINE	61.403	80.9127	36.5592	86.6103	81.1122
L1M3d	L1	LINE	63.3659	81.6424	34.7995	87.1247	81.649
L1M3de	L1	LINE	66.6715	83.55	35.097	84.6368	78.4914
L1M3e	L1	LINE	68.4479	83.9033	38.4245	85.6521	81.385
L1M3f	L1	LINE	62.9255	74.7614	36.7327	83.0486	77.6651
L1M4	L1	LINE	61.5622	84.7643	31.2277	87.5564	81.9321
L1M4b	L1	LINE	60.0849	83.0281	32.6577	86.9475	81.4947
L1M4c	L1	LINE	62.7375	83.4406	36.1624	86.885	82.0229
L1M5	L1	LINE	58.5956	84.8966	28.5182	88.2543	82.7166
L1M6	L1	LINE	58.5778	85.5894	29.0864	87.5864	80.7439
L1M7	L1	LINE	60.4383	86.1806	30.0055	87.8667	81.1265
L1MA1	L1	LINE	64.7721	80.482	36.7327	86.7012	80.7162
L1MA10	L1	LINE	56.6695	84.0464	30.9527	88.4448	81.583
L1MA2	L1	LINE	65.5009	82.7682	35.96	86.8073	81.1044
L1MA3	L1	LINE	66.0344	84.4222	36.3215	87.4808	82.4527
L1MA4	L1	LINE	61.9289	83.4525	34.3149	87.5063	82.2878
L1MA4A	L1	LINE	66.5082	84.2721	37.6572	87.5412	82.8156
L1MA5	L1	LINE	66.3981	83.5082	36.0245	87.4619	81.8728
L1MA5A	L1	LINE	65.4402	83.8648	35.2073	87.8834	83.0878
L1MA6	L1	LINE	62.5826	83.5186	34.5679	87.9013	81.8118
L1MA7	L1	LINE	61.7533	83.2379	32.9973	87.9426	81.9596
L1MA8	L1	LINE	61.105	83.2884	33.2808	87.8169	82.2426
L1MA9	L1	LINE	60.9708	83.2866	32.9339	87.9612	82.5443
L1MB1	L1	LINE	61.9498	83.4606	33.4796	88.5345	81.7844
L1MB2	L1	LINE	64.117	85.5908	31.7494	88.2091	80.8393
L1MB3	L1	LINE	59.1304	84.9247	28.3516	88.4997	82.1148
L1MB4	L1	LINE	61.5648	84.8795	30.1142	88.1481	82.266
L1MB5	L1	LINE	58.7293	85.4452	28.0029	88.0464	81.3754
L1MB7	L1	LINE	63.8491	86.0741	30.9214	88.6427	82.592
L1MB8	L1	LINE	63.4658	85.6878	30.8046	88.6687	83.0056
L1MC	L1	LINE	58.0577	84.0538	28.5097	88.0855	81.6158
L1MC1	L1	LINE	59.8781	85.131	30.4079	88.4901	83.5812
L1MC2	L1	LINE	58.6413	83.6747	29.4573	88.4141	83.1836
L1MC3	L1	LINE	56.1006	84.3516	28.8925	88.0136	82.0446
L1MC4	L1	LINE	61.619	85.7033	29.3944	88.3224	83.1717
L1MC4a	L1	LINE	61.8613	85.5009	29.109	88.5318	82.9259
L1MC5	L1	LINE	61.6991	86.0101	28.6608	88.0106	82.5571
L1MCa	L1	LINE	58.446	83.0563	30.6736	87.3713	81.8397
L1MCb	L1	LINE	52.8217	84.1397	28.6601	86.8583	79.8744
L1MCc	L1	LINE	60.5225	83.9917	30.058	86.7494	81.0994
L1MD	L1	LINE	59.8121	84.7964	29.2824	88.2739	82.6831
L1MD1	L1	LINE	59.2751	85.3238	30.504	88.4588	82.6095
L1MD2	L1	LINE	57.9925	85.0068	28.7028	87.8145	81.4171
L1MD3	L1	LINE	59.1129	86.7	29.7113	88.7519	82.2934
L1MDa	L1	LINE	59.0688	85.0369	30.9372	87.1802	81.1067
L1MDb	L1	LINE	48.1385	69.1361	23.9428	72.077	67.7713
L1ME1	L1	LINE	62.0728	85.4418	31.028	88.407	83.3982
L1ME2	L1	LINE	60.9597	85.4631	30.44	88.4719	83.2993
L1ME2z	L1	LINE	61.3387	86.0664	30.1163	88.3682	83.5406
L1ME3	L1	LINE	58.1107	85.8787	28.4592	88.565	83.8381
L1ME3A	L1	LINE	58.5497	85.9127	28.8409	88.3852	83.1276
L1ME3B	L1	LINE	60.8884	85.2018	29.1723	88.0959	82.699
L1ME3C	L1	LINE	58.6692	84.5942	28.4243	88.4568	83.0471
L1ME3D	L1	LINE	59.6908	84.6519	29.8827	88.7682	83.4851
L1ME3E	L1	LINE	60.9326	85.4046	29.072	88.2542	83.1109
L1ME3F	L1	LINE	59.6273	84.2045	29.4997	88.0182	82.7977
L1ME4a	L1	LINE	59.2166	85.8004	27.8285	88.6398	83.1222
L1ME5	L1	LINE	53.2522	84.7334	25.9419	87.8168	82.4246
L1MEa	L1	LINE	52.1214	76.5818	26.7358	87.5415	82.3044
L1MEb	L1	LINE	63.6397	85.0502	30.2303	86.8061	82.2891
L1MEc	L1	LINE	60.9875	85.2883	31.2876	87.7394	82.5303
L1MEd	L1	LINE	61.0497	87.0466	29.4373	87.8594	82.5701
L1MEe	L1	LINE	59.9386	84.8784	30.5519	88.4224	82.7824
L1MEf	L1	LINE	64.4021	85.4281	33.0495	87.7486	82.6606
L1MEg	L1	LINE	59.8233	85.3886	30.854	88.0792	82.8158
L1MEg1	L1	LINE	54.8335	83.0864	27.2714	87.3733	80.4708
L1MEg2	L1	LINE	54.0597	83.2066	27.8896	87.6417	80.5179
L1P	L1	LINE	38.5128	87.2732	22.9893	89.5486	81.1462
L1P1	L1	LINE	69.6944	81.0202	41.2549	86.1493	82.3165
L1P2	L1	LINE	71.5821	84.0973	39.3322	86.7665	83.4749
L1P3	L1	LINE	64.0315	81.9141	33.0667	86.708	82.2049
L1P4	L1	LINE	59.2792	80.0576	30.5733	86.2798	80.8834
L1P4a	L1	LINE	59.0279	70.7514	31.3911	83.0276	76.5569
L1P4b	L1	LINE	48.1189	55.8458	22.4414	84.5044	78.6684
L1P4d	L1	LINE	51.3533	76.6552	28.0735	84.9503	79.9706
L1P4e	L1	LINE	65.9427	81.314	34.9933	87.0081	81.8525
L1P5	L1	LINE	58.1957	83.4281	32.4001	88.8759	83.821
L1PA10	L1	LINE	64.623	80.7794	32.4406	87.1863	82.5694
L1PA11	L1	LINE	66.957	83.9053	33.8585	87.6312	82.8585
L1PA12	L1	LINE	60.6482	77.9289	30.5896	86.2148	81.5937
L1PA13	L1	LINE	63.8569	83.2519	33.397	87.1674	82.0011
L1PA14	L1	LINE	66.3212	83.6512	34.5618	87.0052	81.4421
L1PA15	L1	LINE	63.3079	83.7794	33.8944	87.4856	82.3132
L1PA15-16	L1	LINE	62.8817	79.9299	33.8606	84.7261	79.4697
L1PA16	L1	LINE	63.3341	83.2756	32.8809	87.2819	82.2587
L1PA17	L1	LINE	61.7561	81.7599	32.0311	86.9234	82.0212
L1PA2	L1	LINE	60.0503	79.105	38.4621	79.9589	83.4464
L1PA3	L1	LINE	72.3054	81.0581	44.1271	85.272	83.4406
L1PA4	L1	LINE	74.9029	81.6397	43.7478	86.8246	83.0757
L1PA5	L1	LINE	73.9879	84.9098	42.1916	87.8435	83.9694
L1PA6	L1	LINE	71.4008	85.8528	39.4859	87.4142	83.7388
L1PA7	L1	LINE	69.2285	85.0335	36.8321	87.4741	82.8223
L1PA8	L1	LINE	64.224	84.5019	33.0163	87.5674	82.9312
L1PA8A	L1	LINE	64.5123	82.327	34.2999	87.1192	82.4784
L1PB	L1	LINE	59.2575	81.2987	31.9608	86.506	81.4136
L1PB1	L1	LINE	65.9602	83.1194	35.5663	87.2623	83.2204
L1PB2	L1	LINE	62.884	83.191	34.275	87.589	83.0085
L1PB3	L1	LINE	63.8834	83.1853	34.5894	87.3072	82.3361
L1PB4	L1	LINE	60.7143	81.8463	32.9441	87.4585	82.4372
L1PBa	L1	LINE	63.0694	82.0565	35.0581	85.445	80.9191
L1PBa1	L1	LINE	64.684	80.144	30.9527	85.1811	81.7287
L1PBb	L1	LINE	63.5174	78.6936	32.4963	86.4232	77.8151
L1PREC2	L1	LINE	64.5096	82.9291	33.4168	86.9014	81.74
L2	L2	LINE	56.8042	85.2541	26.0546	86.4235	80.4565
L2a	L2	LINE	57.0571	85.9661	25.713	86.3867	81.0948
L2b	L2	LINE	55.2184	86.1065	23.6259	85.2529	79.7069
L2c	L2	LINE	57.6725	86.3421	25.4296	86.0278	80.2569
ALINE	RTE	LINE	55.1972	86.2983	26.8319	88.043	83.8706
L4	RTE	LINE	59.512	86.9951	27.3919	88.0635	81.0595
L5	RTE	LINE	55.6055	86.8036	25.3767	87.131	79.7744
X3_LINE	RTE-BovB	LINE	56.3666	83.5624	26.7763	87.7139	77.2366
LTR55	ERV	LTR	51.0181	79.3872	24.2613	74.1751	70.8757
MER95	ERV	LTR	55.695	84.567	25.4264	86.7691	76.5075
Harlequin-int	ERV1	LTR	53.3245	89.8141	29.6801	88.6343	86.42
HERV17-int	ERV1	LTR	52.871	88.0879	30.6135	89.175	83.584
HERV35I-int	ERV1	LTR	57.4707	86.2419	29.472	85.1392	80.9162
HERV3-int	ERV1	LTR	44.5364	81.7632	23.0338	84.3207	78.6638
HERV4_I-int	ERV1	LTR	53.9645	85.3641	27.8121	85.1141	82.7563
HERV9-int	ERV1	LTR	76.1656	86.7443	48.0183	85.8212	83.2721
HERVE_a-int	ERV1	LTR	48.4606	87.1714	28.5162	88.6456	85.0401
HERVE-int	ERV1	LTR	39.4374	61.7417	17.6703	87.2413	83.4463
HERVFH19-int	ERV1	LTR	47.4942	88.545	24.9956	86.1558	81.1735
HERVFH21-int	ERV1	LTR	44.3242	75.3695	20.5581	88.0249	84.3948
HERVH48-int	ERV1	LTR	47.3564	67.3266	23.0694	89.2537	87.5325
HERVH-int	ERV1	LTR	42.8511	89.3088	18.5218	81.7364	84.5731
HERVI-int	ERV1	LTR	69.592	81.4812	40.6807	86.1774	83.7438
HERVIP10FH-int	ERV1	LTR	51.7768	81.5026	25.9509	82.2791	79.0464
HERVIP10F-int	ERV1	LTR	56.8468	79.1925	30.9431	85.6069	83.5552
HERVP71A-int	ERV1	LTR	53.4217	81.5327	24.5915	87.1515	81.8905
HERVS71-int	ERV1	LTR	47.5455	52.7455	22.4528	78.3569	75.1294
HUERS-P1-int	ERV1	LTR	56.6459	86.0583	29.0093	84.7274	83.0123
HUERS-P2-int	ERV1	LTR	38.8939	62.2172	20.0895	84.042	79.944
HUERS-P3b-int	ERV1	LTR	57.9253	74.9414	27.6289	84.3802	80.6303
HUERS-P3-int	ERV1	LTR	54.8753	71.0158	25.9041	82.3164	76.252
LOR1a	ERV1	LTR	59.61	82.0098	34.6188	87.7868	74.6846
LOR1b	ERV1	LTR	54.8449	75.1247	31.421	88.0526	76.9316
LOR1-int	ERV1	LTR	58.8345	84.2955	32.6385	86.6257	81.6201
LTR1	ERV1	LTR	45.2058	44.5679	19.7255	85.8292	83.7809
LTR10A	ERV1	LTR	72.3172	79.9966	43.7798	87.6423	82.7664
LTR10B1	ERV1	LTR	67.7754	74.73	39.1697	83.2673	76.339
LTR10C	ERV1	LTR	62.5344	82.2964	31.9916	86.6209	80.435
LTR10D	ERV1	LTR	52.002	73.4582	24.6056	78.9685	77.3807
LTR10E	ERV1	LTR	62.5109	79.4966	35.1456	88.4093	77.5887
LTR10F	ERV1	LTR	44.7314	68.4369	22.8333	88.8867	87.5942
LTR10G	ERV1	LTR	65.99	74.7015	38.1758	88.142	82.6416
LTR12	ERV1	LTR	72.0788	71.1806	48.5606	90.7355	83.2623
LTR12_	ERV1	LTR	64.3466	57.1764	38.026	91.0665	81.7011
LTR12B	ERV1	LTR	65.1656	39.6162	25.9893	90.8315	81.9348
LTR12C	ERV1	LTR	55.0668	32.6758	28.8866	91.0694	87.6726
LTR12D	ERV1	LTR	56.3553	36.4433	30.6937	88.3701	83.7594
LTR12E	ERV1	LTR	45.939	18.2494	20.6161	86.5419	84.3708
LTR12F	ERV1	LTR	63.363	46.6854	34.0753	90.4081	83.9735
LTR15	ERV1	LTR	43.4003	79.0061	18.8417	83.9108	68.671
LTR17	ERV1	LTR	53.8987	80.2124	29.1323	90.3597	89.1173
LTR19A	ERV1	LTR	58.2369	81.4202	30.7568	87.2354	80.9619
LTR19B	ERV1	LTR	49.8073	77.2827	24.3385	79.8765	65.2213
LTR19C	ERV1	LTR	45.1696	69.6254	18.4178	78.9955	67.398
LTR19-int	ERV1	LTR	60.0143	80.8045	31.7007	87.1889	83.2283
LTR1B	ERV1	LTR	56.266	75.0274	26.9643	87.604	83.9769
LTR1C	ERV1	LTR	36.067	69.2062	17.8505	87.2665	84.3084
LTR1D	ERV1	LTR	60.7005	71.5591	33.465	85.8257	84.5007
LTR2	ERV1	LTR	51.3955	82.5389	24.8352	87.8303	80.102
LTR23	ERV1	LTR	49.9163	76.9111	20.967	81.6546	79.6543
LTR23-int	ERV1	LTR	43.779	80.0459	23.3091	84.1517	74.2889
LTR24	ERV1	LTR	41.9144	74.5753	17.743	85.6135	73.3498
LTR24B	ERV1	LTR	46.1915	77.3928	20.3737	82.4828	73.3637
LTR24C	ERV1	LTR	49.5376	82.8402	21.4657	81.0494	76.4203
LTR25	ERV1	LTR	43.7222	53.5424	22.9983	79.9683	73.0453
LTR25-int	ERV1	LTR	59.6455	75.0166	30.1594	81.8782	77.6335
LTR26	ERV1	LTR	51.9136	82.9138	24.7299	85.3077	77.4529
LTR26B	ERV1	LTR	46.1063	86.1309	21.3828	83.4801	79.3948
LTR26E	ERV1	LTR	40.6925	74.8816	19.1457	72.6013	67.079
LTR27	ERV1	LTR	65.5408	78.3516	39.3455	86.4689	85.1176
LTR27B	ERV1	LTR	63.8104	65.7148	38.9631	87.5187	85.8248
LTR28	ERV1	LTR	62.3402	79.1471	39.7187	86.9483	86.5795
LTR29	ERV1	LTR	43.0852	82.6967	19.4123	82.3914	77.8206
LTR2B	ERV1	LTR	50.4288	85.6005	24.6346	87.1089	76.0614
LTR2C	ERV1	LTR	30.8791	69.4609	15.8552	82.4814	70.5263
LTR30	ERV1	LTR	45.5451	52.7504	21.4328	79.4543	73.3806
LTR31	ERV1	LTR	49.8407	85.2087	24.1285	88.2558	77.0615
LTR34	ERV1	LTR	40.8171	80.4189	20.1315	77.7927	71.6306
LTR35	ERV1	LTR	56.7688	81.5866	25.508	82.0372	79.4356
LTR35B	ERV1	LTR	41.2243	83.8336	20.7738	86.2518	74.4076
LTR36	ERV1	LTR	52.1962	80.7115	23.2331	74.9037	72.0704
LTR37A	ERV1	LTR	51.0597	82.367	24.0603	85.4374	80.1656
LTR37B	ERV1	LTR	52.2458	85.4811	24.2644	88.1079	81.5329
LTR38	ERV1	LTR	44.6573	81.0627	23.3371	86.7431	79.9864
LTR38B	ERV1	LTR	54.4264	77.3428	23.6877	86.9331	78.5002
LTR38C	ERV1	LTR	47.0833	83.0573	24.3914	86.8409	80.2297
LTR38-int	ERV1	LTR	43.0658	84.1351	24.1633	83.9644	81.4584
LTR39	ERV1	LTR	45.5053	82.0124	20.6627	85.5508	75.5667
LTR39-int	ERV1	LTR	46.8042	80.7732	21.3994	83.9481	76.5959
LTR4	ERV1	LTR	62.5752	81.3275	28.858	82.8905	52.9344
LTR43	ERV1	LTR	43.9454	77.3004	22.5683	83.8595	79.3876
LTR43B	ERV1	LTR	35.36	71.5593	18.8023	88.3279	73.3966
LTR43-int	ERV1	LTR	30.9678	73.1338	13.4986	73.6027	67.7539
LTR44	ERV1	LTR	42.7365	83.9246	21.2781	84.6801	74.3986
LTR45	ERV1	LTR	42.065	77.0807	19.5301	86.7581	81.8563
LTR45B	ERV1	LTR	51.9831	77.9069	26.1833	88.6492	83.4897
LTR45C	ERV1	LTR	50.6698	74.3932	23.5154	86.8417	79.8822
LTR46	ERV1	LTR	43.9407	66.6034	18.0409	83.5974	75.7327
LTR48	ERV1	LTR	53.9608	85.622	24.5556	80.7738	79.4271
LTR48B	ERV1	LTR	48.4906	85.5029	23.0805	85.395	78.4911
LTR49	ERV1	LTR	49.853	83.2871	22.7528	74.3728	77.1248
LTR49-int	ERV1	LTR	52.9941	84.2355	27.895	84.9114	80.7332
LTR51	ERV1	LTR	47.8864	82.8293	23.0421	85.1514	76.1179
LTR54	ERV1	LTR	45.0688	80.4152	20.1879	86.0753	78.0983
LTR54B	ERV1	LTR	49.1105	81.7281	22.3778	86.2348	78.2125
LTR56	ERV1	LTR	49.7085	78.499	22.7058	83.7808	80.7432
LTR59	ERV1	LTR	56.8038	83.6128	24.8927	86.705	79.3756
LTR60	ERV1	LTR	64.5814	61.2305	26.2686	84.1576	76.509
LTR61	ERV1	LTR	42.3769	79.6645	17.1947	80.8067	75.3593
LTR64	ERV1	LTR	44.9933	78.0949	19.5044	86.7837	80.8712
LTR65	ERV1	LTR	38.9895	69.9967	18.7252	81.2482	73.7509
LTR68	ERV1	LTR	53.7916	83.5617	25.6872	81.1031	78.497
LTR6A	ERV1	LTR	31.6788	61.1528	13.7779	66.0596	71.6757
LTR6B	ERV1	LTR	29.8818	59.3516	13.3214	87.6095	81.9715
LTR7	ERV1	LTR	51.5157	86.9219	19.789	62.9878	82.8792
LTR70	ERV1	LTR	62.3726	77.2439	25.9718	78.1245	81.0477
LTR71A	ERV1	LTR	61.1233	66.3469	27.2637	89.9054	80.0521
LTR71B	ERV1	LTR	40.6221	80.0938	19.1619	84.1846	76.6
LTR72	ERV1	LTR	38.4161	83.0204	19.6307	83.6767	80.0964
LTR72B	ERV1	LTR	51.102	80.7472	24.2831	89.0345	84.2611
LTR73	ERV1	LTR	49.1551	78.5733	24.2474	83.2245	70.3439
LTR75_1	ERV1	LTR	43.0829	73.526	21.2249	85.2441	76.7096
LTR76	ERV1	LTR	62.8379	81.1226	32.175	86.2303	79.3319
LTR77	ERV1	LTR	50.3429	74.8449	34.4754	88.5648	66.1648
LTR78	ERV1	LTR	50.6141	85.7443	23.8191	86.2511	79.7704
LTR78B	ERV1	LTR	52.5778	85.1254	24.3451	87.1371	80.1115
LTR7B	ERV1	LTR	51.2555	85.5462	15.5985	88.2773	87.6184
LTR7C	ERV1	LTR	52.2887	80.8174	21.3115	85.7694	77.6692
LTR7Y	ERV1	LTR	55.7256	89.4134	13.1902	79.5654	86.6122
LTR8	ERV1	LTR	46.6632	81.0653	20.2461	84.2119	81.4215
LTR8A	ERV1	LTR	53.4598	84.6565	23.63	84.8718	79.964
LTR9	ERV1	LTR	49.0059	57.6504	20.9684	83.4585	82.5008
LTR9B	ERV1	LTR	44.2384	51.9611	19.1327	70.2258	80.1151
MER101	ERV1	LTR	38.1542	53.4692	18.6453	83.6394	80.3166
MER101B	ERV1	LTR	46.746	60.6544	21.8218	86.5749	77.0403
MER101-int	ERV1	LTR	58.7459	85.419	31.4251	86.2607	81.5463
MER110	ERV1	LTR	53.2735	84.7707	26.776	87.5798	78.1202
MER110A	ERV1	LTR	48.1796	82.5018	22.7043	85.6324	79.1567
MER110-int	ERV1	LTR	58.5032	85.4263	30.0745	86.9315	80.6573
MER31A	ERV1	LTR	47.1569	84.9764	20.1238	86.0529	81.5009
MER31B	ERV1	LTR	50.6096	85.8137	21.7664	85.6631	81.8274
MER31-int	ERV1	LTR	52.0907	85.1136	26.0155	87.232	82.1662
MER34	ERV1	LTR	50.5554	81.2994	23.7688	85.7548	78.0821
MER34A	ERV1	LTR	51.4328	86.1901	23.7794	86.5666	79.425
MER34A1	ERV1	LTR	47.2944	83.7278	23.5704	82.7495	77.2475
MER34B	ERV1	LTR	48.5376	85.7666	22.2802	80.3038	77.3072
MER34B-int	ERV1	LTR	53.0282	86.1683	26.8523	86.669	81.556
MER34C	ERV1	LTR	56.094	82.2582	23.7143	77.6519	79.5064
MER34C_	ERV1	LTR	55.2594	84.2719	24.4312	76.8577	77.7686
MER34C2	ERV1	LTR	51.2221	82.7702	23.0125	79.8297	74.5481
MER34D	ERV1	LTR	44.6603	81.9904	22.9609	84.7613	81.06
MER34-int	ERV1	LTR	38.8671	89.641	21.1017	86.5592	80.969
MER39	ERV1	LTR	51.5637	85.6643	25.0732	86.9161	81.4806
MER39B	ERV1	LTR	49.44	83.5593	23.5956	87.2038	82.6638
MER41A	ERV1	LTR	49.4202	85.6736	23.3041	85.26	82.8621
MER41B	ERV1	LTR	47.1258	84.4346	22.5115	84.4325	80.0003
MER41C	ERV1	LTR	47.7004	79.3082	22.2488	87.8423	84.4256
MER41D	ERV1	LTR	41.3869	80.083	19.6	86.3965	82.7304
MER41E	ERV1	LTR	50.0111	82.5593	24.2688	86.6605	79.066
MER41G	ERV1	LTR	35.3404	68.9339	16.3153	78.4987	71.814
MER41-int	ERV1	LTR	60.9459	86.0819	30.4614	86.9141	82.422
MER48	ERV1	LTR	42.1486	48.164	20.7305	90.3528	79.4706
MER49	ERV1	LTR	41.7275	84.1631	18.9562	85.8095	79.1603
MER4A	ERV1	LTR	44.2558	83.8638	20.1611	79.6139	79.8894
MER4A1	ERV1	LTR	50.4182	83.9764	25.0052	82.1327	80.3451
MER4A1_	ERV1	LTR	48.7457	84.349	22.6461	82.4483	83.0118
MER4B	ERV1	LTR	52.3135	85.0413	22.4863	81.9829	80.9658
MER4B-int	ERV1	LTR	51.4442	79.3403	26.3361	83.5764	79.0937
MER4C	ERV1	LTR	48.294	81.0421	21.5457	76.6764	71.4449
MER4D	ERV1	LTR	52.2627	85.8392	23.9227	79.5371	80.1839
MER4D0	ERV1	LTR	55.2384	85.8473	25.2542	77.114	79.7058
MER4D1	ERV1	LTR	50.487	84.2483	21.5204	79.1367	80.7711
MER4E	ERV1	LTR	50.3992	83.5724	24.809	84.0879	75.2554
MER4E1	ERV1	LTR	48.6534	84.9476	23.1767	81.4348	81.3112
MER4-int	ERV1	LTR	56.6094	82.0787	31.9118	81.6714	79.8608
MER50	ERV1	LTR	38.2515	71.5467	19.6547	89.1131	83.871
MER50B	ERV1	LTR	41.6543	57.2801	19.9162	89.6405	83.3823
MER50C	ERV1	LTR	44.702	49.2089	18.3437	80.4359	67.3733
MER50-int	ERV1	LTR	57.4203	85.68	30.5528	86.5004	80.2042
MER51A	ERV1	LTR	48.7157	44.5778	20.359	86.1647	82.027
MER51B	ERV1	LTR	44.0974	77.659	22.2358	85.6389	81.4769
MER51C	ERV1	LTR	33.8676	63.1171	14.2306	78.4139	72.7231
MER51D	ERV1	LTR	33.5184	70.6814	16.5115	81.5852	73.3706
MER51E	ERV1	LTR	24.0876	55.5723	14.0756	84.646	79.8202
MER51-int	ERV1	LTR	56.8249	80.2597	30.7403	82.8754	82.4686
MER52A	ERV1	LTR	61.6977	64.0741	36.0974	88.0314	85.601
MER52C	ERV1	LTR	50.9791	52.572	24.0609	81.6861	82.0465
MER52D	ERV1	LTR	61.9394	63.0389	34.1949	84.9998	83.3594
MER52-int	ERV1	LTR	57.8807	81.5669	33.4183	86.591	79.8736
MER57A1	ERV1	LTR	50.8237	71.7938	25.5621	88.2839	76.5107
MER57A-int	ERV1	LTR	54.76	84.5004	28.9379	87.2495	82.8516
MER57B1	ERV1	LTR	45.7921	75.957	23.2768	88.0881	74.122
MER57B2	ERV1	LTR	51.4465	77.8416	24.458	87.941	73.5187
MER57C1	ERV1	LTR	52.7436	70.5264	23.8618	85.7273	78.8537
MER57C2	ERV1	LTR	46.0999	70.6741	24.1156	86.6273	78.4125
MER57D	ERV1	LTR	53.5748	74.1451	26.812	88.0889	81.9937
MER57E1	ERV1	LTR	53.305	81.9126	28.2515	87.7766	81.179
MER57E3	ERV1	LTR	26.2088	11.523	7.06156	50.8908	37.4117
MER57F	ERV1	LTR	45.8544	82.2828	24.7007	87.6752	79.5885
MER57-int	ERV1	LTR	55.7012	82.2737	30.976	86.2371	82.1047
MER61A	ERV1	LTR	47.7127	54.249	22.1794	81.847	77.8562
MER61B	ERV1	LTR	41.6092	58.789	17.8243	80.1298	76.9455
MER61C	ERV1	LTR	58.2733	65.4671	25.2762	83.6021	80.658
MER61D	ERV1	LTR	61.3493	72.7236	33.1962	85.3884	80.0088
MER61E	ERV1	LTR	59.1102	79.3798	23.7188	85.7273	76.365
MER61F	ERV1	LTR	48.9943	59.0893	23.0458	83.0515	59.7244
MER61-int	ERV1	LTR	50.3233	72.6599	25.124	83.3528	79.7032
MER65A	ERV1	LTR	48.868	83.6729	24.0408	85.9038	77.8582
MER65B	ERV1	LTR	42.9246	82.694	22.1743	85.2958	80.3429
MER65C	ERV1	LTR	42.2135	75.562	20.5539	84.0828	80.1013
MER65D	ERV1	LTR	47.0238	79.5459	21.7644	86.9057	75.4006
MER65-int	ERV1	LTR	54.1228	83.7441	27.5047	84.0221	80.7217
MER66A	ERV1	LTR	52.0003	73.6358	24.081	83.749	78.72
MER66B	ERV1	LTR	52.1419	74.6423	27.7077	84.3199	80.7991
MER66C	ERV1	LTR	51.3065	81.6439	27.8269	81.0377	76.8306
MER66D	ERV1	LTR	52.3367	77.1132	27.5054	87.4918	80.2222
MER66-int	ERV1	LTR	52.7752	86.2358	27.0036	86.8632	81.4244
MER67A	ERV1	LTR	44.1975	77.3358	18.6429	80.2673	73.8941
MER67B	ERV1	LTR	42.4889	75.6993	18.4711	74.3931	75.6738
MER67C	ERV1	LTR	45.2976	76.3666	21.2397	77.867	75.9715
MER67D	ERV1	LTR	53.2328	79.9324	24.8266	75.504	72.703
MER72	ERV1	LTR	53.6743	82.3011	23.8517	87.4701	77.3176
MER72B	ERV1	LTR	48.5871	85.8762	23.0584	88.1395	80.4473
MER83	ERV1	LTR	42.6837	83.5513	22.1311	87.0037	77.2364
MER83A-int	ERV1	LTR	34.1922	86.2858	17.0604	84.8135	78.3617
MER83B	ERV1	LTR	52.1939	88.5375	24.564	85.1778	77.2106
MER83B-int	ERV1	LTR	44.2793	82.4661	23.6628	83.6718	79.5248
MER83C	ERV1	LTR	59.3143	83.2969	26.4906	84.561	70.7874
MER84	ERV1	LTR	43.0363	78.1337	23.8492	83.796	79.3063
MER84-int	ERV1	LTR	40.795	77.3776	23.6179	85.246	80.8334
MER87	ERV1	LTR	43.4889	86.6299	26.6569	88.4503	80.2079
MER87B	ERV1	LTR	43.9923	83.1402	20.3671	86.4472	78.4609
MER89	ERV1	LTR	46.6166	81.8963	22.2522	84.6166	73.9126
MER89-int	ERV1	LTR	47.032	84.1378	24.5607	84.9254	80.6807
MER90	ERV1	LTR	49.6419	81.1974	22.6796	84.9815	76.8571
MER90a	ERV1	LTR	51.1199	84.0801	23.9896	86.3508	78.1111
MER92A	ERV1	LTR	39.8387	71.6555	21.5986	86.2412	71.6782
MER92B	ERV1	LTR	44.0507	79.6091	20.6479	85.0455	77.8247
MER92C	ERV1	LTR	51.74	78.5334	22.1814	84.8519	70.2335
PABL_A	ERV1	LTR	38.9862	82.5208	18.4719	83.7962	82.0422
PABL_A-int	ERV1	LTR	53.1901	82.9428	28.979	87.0718	83.4016
PABL_B	ERV1	LTR	41.2165	78.6222	19.5411	85.434	81.6835
PABL_B-int	ERV1	LTR	51.493	90.2137	28.3884	86.2414	80.632
PRIMA4_LTR	ERV1	LTR	49.0579	83.0012	23.975	80.7647	78.4783
PRIMA41-int	ERV1	LTR	42.4065	80.256	21.2414	85.1053	81.0735
PRIMA4-int	ERV1	LTR	45.5342	81.162	24.6209	84.8873	81.02
PRIMAX-int	ERV1	LTR	47.8894	86.8331	27.7477	87.2845	80.2406
PrimLTR79	ERV1	LTR	41.1802	82.0218	20.4074	84.7913	75.7042
HERVK11-int	ERVK	LTR	60.9005	68.0002	27.5773	82.0835	80.2393
HERVK14-int	ERVK	LTR	34.6518	81.2495	21.0327	85.4505	80.9205
HERVK22-int	ERVK	LTR	57.8315	79.2329	33.5962	85.5882	81.9248
HERVK3-int	ERVK	LTR	46.806	82.1967	21.3722	85.0093	82.0241
HERVK9-int	ERVK	LTR	66.0412	83.1609	41.4797	86.4866	80.7224
HERVK-int	ERVK	LTR	48.1264	66.1156	23.3332	79.6183	74.5153
LTR13	ERVK	LTR	60.929	83.0649	30.7588	76.2465	76.1668
LTR13A	ERVK	LTR	43.7405	76.3417	20.957	89.4138	80.8345
LTR14A	ERVK	LTR	35.4947	59.8776	22.0523	85.538	80.613
LTR14B	ERVK	LTR	39.0647	83.983	25.716	86.7608	83.1665
LTR14C	ERVK	LTR	50.612	51.7085	18.2693	83.374	79.9161
LTR22	ERVK	LTR	25.805	69.5627	17.2091	82.549	82.7162
LTR22A	ERVK	LTR	44.7348	77.2252	26.1771	86.6285	83.9572
LTR22B	ERVK	LTR	53.733	69.0966	24.5127	72.2806	78.8266
LTR22C	ERVK	LTR	60.2891	83.8223	29.3685	80.0236	84.6153
LTR3A	ERVK	LTR	60.2235	85.8551	27.5549	87.3327	81.0688
LTR3B_	ERVK	LTR	18.4496	75.7808	11.7949	88.2548	83.89
LTR5_Hs	ERVK	LTR	40.1805	83.7873	9.63514	68.7724	68.8772
LTR5A	ERVK	LTR	35.383	68.9878	15.3645	86.6463	81.3415
LTR5B	ERVK	LTR	40.6903	85.0747	17.846	86.5218	73.3235
MER11A	ERVK	LTR	79.2717	86.0886	39.3515	88.9265	83.6016
MER11B	ERVK	LTR	80.7416	87.4152	41.4046	87.4628	85.9935
MER11C	ERVK	LTR	75.4958	87.1612	41.1429	79.9669	84.2468
MER11D	ERVK	LTR	68.4417	85.9662	32.0829	86.84	81.9422
MER9a1	ERVK	LTR	55.7836	83.4541	36.0215	88.7853	85.9482
MER9a2	ERVK	LTR	60.3688	83.8259	37.4885	88.5172	84.2909
MER9a3	ERVK	LTR	66.6697	86.7222	39.8197	88.9776	85.6703
ERV3-16A3_I-int	ERVL	LTR	47.7646	88.4002	25.3161	87.6459	82.3498
ERV3-16A3_LTR	ERVL	LTR	44.5757	84.3253	22.0392	84.8332	77.084
ERVL-B4-int	ERVL	LTR	51.0163	87.5106	26.799	87.4854	81.8654
ERVL-E-int	ERVL	LTR	48.1798	87.2204	24.9137	87.6972	82.066
ERVL-int	ERVL	LTR	51.9275	86.7562	27.1899	87.3322	82.7427
HERV16-int	ERVL	LTR	46.1839	87.2439	24.0751	87.3013	81.9323
HERVL18-int	ERVL	LTR	42.8169	80.416	25.7976	88.6447	84.888
HERVL32-int	ERVL	LTR	46.7755	85.9556	21.7898	86.2574	82.5717
HERVL40-int	ERVL	LTR	56.4194	88.9792	28.2788	87.3123	81.8385
HERVL66-int	ERVL	LTR	41.3995	75.6813	17.7926	81.899	85.8293
HERVL74-int	ERVL	LTR	51.4649	88.0386	26.3475	85.5324	81.7882
HERVL-int	ERVL	LTR	60.4422	86.7937	31.627	87.7808	82.002
LTR16A	ERVL	LTR	46.463	86.22	22.7841	85.7216	80.0339
LTR16A1	ERVL	LTR	44.6823	86.1281	20.67	84.4693	76.6894
LTR16A2	ERVL	LTR	46.4124	86.102	21.3238	84.5921	77.8295
LTR16B	ERVL	LTR	56.4903	85.055	25.8105	86.6804	80.9747
LTR16B1	ERVL	LTR	49.0778	85.2762	24.2962	86.6029	80.9669
LTR16B2	ERVL	LTR	44.6577	82.1034	22.2487	84.7647	78.1153
LTR16C	ERVL	LTR	47.0126	87.2523	21.5104	85.6594	78.5686
LTR16D	ERVL	LTR	50.9266	86.2203	24.4068	86.8866	79.0711
LTR16D1	ERVL	LTR	51.0652	81.8493	26.254	85.663	73.9788
LTR16D2	ERVL	LTR	43.8405	79.1516	23.7407	87.0033	77.962
LTR16E1	ERVL	LTR	48.8449	85.5418	23.1732	86.1974	79.5769
LTR16E2	ERVL	LTR	49.7511	86.1533	24.4395	86.9912	80.9405
LTR18A	ERVL	LTR	51.8769	84.2421	31.1011	91.1669	84.1503
LTR18B	ERVL	LTR	35.8679	81.5325	18.5533	87.6375	85.4316
LTR32	ERVL	LTR	38.3035	88.4158	19.5253	88.5082	82.3449
LTR33	ERVL	LTR	49.9482	85.6075	22.966	84.4886	77.0491
LTR33A	ERVL	LTR	48.1222	81.8281	22.1844	83.7073	74.5899
LTR33A_	ERVL	LTR	48.2042	82.7317	21.4836	82.748	74.6831
LTR33B	ERVL	LTR	53.0347	83.6685	25.5675	85.3258	76.1733
LTR33C	ERVL	LTR	51.1512	84.9736	24.8201	86.6134	77.0826
LTR40a	ERVL	LTR	54.6504	84.7467	26.5802	86.6993	81.2196
LTR40A1	ERVL	LTR	53.4548	85.0365	26.9193	83.1065	78.9517
LTR40b	ERVL	LTR	53.1447	86.408	25.1681	86.3485	81.1238
LTR40c	ERVL	LTR	57.3598	86.9538	26.3376	86.3533	81.8982
LTR41	ERVL	LTR	52.1924	75.4586	24.0408	77.3015	72.1348
LTR41B	ERVL	LTR	49.0056	70.1398	23.353	72.2864	68.6312
LTR42	ERVL	LTR	50.5959	81.6822	21.8221	86.1013	82.0692
LTR47A	ERVL	LTR	52.0526	84.1987	23.4502	87.5424	85.2966
LTR47B	ERVL	LTR	49.0718	86.9276	23.1256	87.5477	81.5782
LTR50	ERVL	LTR	48.8507	75.6533	22.7205	78.8183	68.0099
LTR52	ERVL	LTR	51.7585	81.13	25.8242	85.0253	72.6293
LTR52-int	ERVL	LTR	49.2367	87.3364	27.7133	86.2895	80.6099
LTR53	ERVL	LTR	54.2758	85.6405	24.5166	85.9801	78.2233
LTR57	ERVL	LTR	50.5419	87.2238	25.9108	88.2632	85.0608
LTR57-int	ERVL	LTR	46.9406	85.9343	25.8054	86.0334	81.5625
LTR62	ERVL	LTR	42.5293	79.7509	21.3624	87.0767	77.8223
LTR66	ERVL	LTR	42.5897	74.8875	23.2428	85.1118	86.4097
LTR67B	ERVL	LTR	50.5003	86.7104	23.3333	86.5109	78.4666
LTR69	ERVL	LTR	55.9846	87.5669	27.6595	89.8999	83.3273
LTR75	ERVL	LTR	43.0669	84.8278	21.402	81.8204	74.2483
LTR75B	ERVL	LTR	39.1496	82.3127	20.4459	79.7812	75.4071
LTR79	ERVL	LTR	56.0871	85.7511	25.9664	86.7112	79.7922
LTR80A	ERVL	LTR	52.3027	80.5499	26.7846	86.2373	80.3953
LTR80B	ERVL	LTR	59.1882	84.8175	28.5973	87.5984	80.0253
LTR82A	ERVL	LTR	56.4377	87.3397	26.4199	86.65	83.5082
LTR82B	ERVL	LTR	51.5337	87.9515	23.9937	86.6908	82.2357
LTR83	ERVL	LTR	52.7738	83.9322	25.35	87.621	77.9232
LTR84a	ERVL	LTR	55.5026	84.8671	24.7729	86.2032	80.3538
LTR84b	ERVL	LTR	54.8355	86.2729	24.7206	86.2577	79.5246
LTR86A1	ERVL	LTR	71.0165	88.7622	31.0125	87.2816	79.6641
LTR86A2	ERVL	LTR	62.7309	87.6717	29.1746	88.0346	78.8679
LTR86B1	ERVL	LTR	59.0252	86.2047	27.577	86.9979	81.9726
LTR86B2	ERVL	LTR	57.3074	86.9184	26.7285	85.0838	79.2862
LTR86C	ERVL	LTR	55.9428	85.1179	25.6664	86.773	81.5648
MER21A	ERVL	LTR	54.8455	87.9013	24.4542	88.5752	84.2624
MER21B	ERVL	LTR	55.3291	87.0517	25.4982	85.9616	83.0902
MER21C	ERVL	LTR	57.0616	87.6836	25.9441	85.634	83.1553
MER21-int	ERVL	LTR	51.0141	86.7934	23.4922	86.2771	80.6683
MER54A	ERVL	LTR	54.1402	80.6884	24.0649	84.2466	78.4983
MER54B	ERVL	LTR	57.553	83.9402	25.8307	85.0054	77.1337
MER68	ERVL	LTR	71.0947	89.5687	31.8632	88.8501	84.4662
MER68B	ERVL	LTR	68.0284	86.9885	28.9742	87.7467	84.1514
MER68-int	ERVL	LTR	55.0079	88.7336	24.3134	81.5501	79.0916
MER70A	ERVL	LTR	51.6527	83.8017	24.5503	87.0899	80.2686
MER70B	ERVL	LTR	43.7528	83.4715	20.5657	85.4381	77.6477
MER70C	ERVL	LTR	46.2115	85.2043	24.2608	87.0779	82.0822
MER70-int	ERVL	LTR	42.0944	89.722	22.1368	85.8369	83.0087
MER73	ERVL	LTR	38.6705	75.6995	19.5229	85.3859	75.3942
MER74A	ERVL	LTR	50.3354	88.0277	21.8023	78.3734	74.3993
MER74B	ERVL	LTR	55.7397	89.4251	23.343	81.6183	77.5886
MER74C	ERVL	LTR	50.3505	83.6203	25.6875	86.6995	76.0499
MER76	ERVL	LTR	47.3209	79.5122	23.1332	86.6069	82.1739
MER76-int	ERVL	LTR	62.684	81.6499	33.052	85.2818	83.0501
MER77	ERVL	LTR	59.3811	88.5565	25.4514	86.2094	82.8407
MER77B	ERVL	LTR	62.4056	87.4097	28.413	87.7152	83.1841
MER88	ERVL	LTR	56.2058	77.4218	24.1908	83.5608	73.0042
MLT2A1	ERVL	LTR	59.2897	86.2688	23.3403	87.5482	84.1367
MLT2A2	ERVL	LTR	57.1771	87.3076	24.4705	88.1973	83.3276
MLT2B1	ERVL	LTR	55.9156	88.1122	26.4776	86.709	83.4722
MLT2B2	ERVL	LTR	55.7016	88.137	26.0949	87.5367	84.0324
MLT2B3	ERVL	LTR	55.4365	85.9993	27.007	87.8468	83.8609
MLT2B4	ERVL	LTR	55.766	87.6964	27.2509	87.2161	83.1254
MLT2B5	ERVL	LTR	49.104	79.5504	23.0691	87.7058	83.8775
MLT2C1	ERVL	LTR	50.2343	87.625	23.7427	87.7181	82.4051
MLT2C2	ERVL	LTR	51.4662	85.6481	24.9197	87.6825	83.1201
MLT2D	ERVL	LTR	53.2831	87.9753	26.2478	87.0571	83.3935
MLT2E	ERVL	LTR	55.846	86.0973	26.2496	87.6962	79.6337
MLT2F	ERVL	LTR	48.6022	82.9092	23.8834	85.8065	79.5397
LTR87	ERVL?	LTR	71.5519	89.063	32.8915	87.2769	83.968
LTR89	ERVL?	LTR	55.4592	87.6011	25.5045	86.7328	80.0947
MLT1A	ERVL-MaLR	LTR	57.0403	87.9659	25.0176	87.0346	82.1002
MLT1A0	ERVL-MaLR	LTR	56.9007	87.5186	25.1275	87.4732	82.3801
MLT1A0-int	ERVL-MaLR	LTR	60.7529	87.3507	28.0442	88.0825	82.2968
MLT1A1	ERVL-MaLR	LTR	56.655	86.5911	25.4924	87.1827	82.9904
MLT1A1-int	ERVL-MaLR	LTR	56.0006	89.9812	27.5845	87.707	82.2895
MLT1A-int	ERVL-MaLR	LTR	55.8927	89.4415	26.2121	88.5721	82.7064
MLT1B	ERVL-MaLR	LTR	53.3074	87.4512	23.6804	87.7115	81.5904
MLT1B-int	ERVL-MaLR	LTR	55.2725	87.8308	26.7911	88.5436	82.638
MLT1C	ERVL-MaLR	LTR	53.9463	88.1227	24.3772	87.6105	82.2998
MLT1C-int	ERVL-MaLR	LTR	54.1201	87.0109	27.8828	87.0578	80.3207
MLT1D	ERVL-MaLR	LTR	51.854	87.058	22.9748	87.2474	81.9077
MLT1D-int	ERVL-MaLR	LTR	62.8454	88.086	28.517	88.4564	79.8228
MLT1E	ERVL-MaLR	LTR	54.0507	85.5955	26.1996	87.8251	81.2063
MLT1E1	ERVL-MaLR	LTR	54.5724	89.0584	25.9509	88.5188	81.8378
MLT1E1A	ERVL-MaLR	LTR	58.5892	87.2666	27.7837	87.8714	81.3217
MLT1E2	ERVL-MaLR	LTR	51.2719	84.4591	23.8013	87.0207	80.0286
MLT1E2-int	ERVL-MaLR	LTR	53.4202	86.9726	25.5517	88.2983	79.3011
MLT1E3	ERVL-MaLR	LTR	51.2946	86.9416	24.2103	87.4017	79.4609
MLT1F	ERVL-MaLR	LTR	57.8098	88.6496	26.0166	87.9011	82.8999
MLT1F1	ERVL-MaLR	LTR	57.6561	88.193	25.6013	87.4755	80.8915
MLT1F1-int	ERVL-MaLR	LTR	58.5711	85.1435	27.4052	87.4645	82.0994
MLT1F2	ERVL-MaLR	LTR	57.5059	86.7412	25.7816	87.401	80.7752
MLT1F2-int	ERVL-MaLR	LTR	53.8805	86.7169	28.1419	88.7792	80.2718
MLT1F-int	ERVL-MaLR	LTR	56.2051	86.6792	28.657	87.6303	81.8346
MLT1G	ERVL-MaLR	LTR	53.1074	88.7219	24.5048	87.5337	81.875
MLT1G1	ERVL-MaLR	LTR	53.0816	88.0801	24.3955	87.8383	81.7038
MLT1G1-int	ERVL-MaLR	LTR	55.7689	85.6158	27.3068	88.2006	81.9019
MLT1G3	ERVL-MaLR	LTR	54.405	88.2858	25.0426	87.6769	81.8036
MLT1G3-int	ERVL-MaLR	LTR	54.0672	86.9736	25	88.1962	81.0662
MLT1G-int	ERVL-MaLR	LTR	57.6185	87.9476	27.3307	86.5021	82.1359
MLT1H	ERVL-MaLR	LTR	54.5642	87.9544	24.5993	87.5176	81.3083
MLT1H1	ERVL-MaLR	LTR	51.8509	87.4916	25.0219	87.5274	82.176
MLT1H1-int	ERVL-MaLR	LTR	56.9608	79.5543	27.8533	85.7227	80.3796
MLT1H2	ERVL-MaLR	LTR	56.6575	86.9274	25.8187	87.4935	81.1647
MLT1H2-int	ERVL-MaLR	LTR	60.955	86.0576	30.3318	88.1196	81.0547
MLT1H-int	ERVL-MaLR	LTR	56.681	85.2297	27.1924	88.8284	81.9793
MLT1I	ERVL-MaLR	LTR	54.8961	85.5015	25.5484	87.2128	80.1407
MLT1I-int	ERVL-MaLR	LTR	55.4874	85.0645	27.2551	88.2654	81.8348
MLT1-int	ERVL-MaLR	LTR	46.0482	90.4087	25.4125	87.4837	80.4482
MLT1J	ERVL-MaLR	LTR	55.2242	86.0205	24.6694	86.9958	80.2759
MLT1J1	ERVL-MaLR	LTR	53.9945	85.9954	25.5744	86.8623	79.8302
MLT1J1-int	ERVL-MaLR	LTR	49.5541	81.7231	24.1146	88.2667	80.716
MLT1J2	ERVL-MaLR	LTR	54.9845	86.0792	25.4328	86.3991	79.9215
MLT1J2-int	ERVL-MaLR	LTR	54.293	84.5649	26.7222	87.8154	79.604
MLT1J-int	ERVL-MaLR	LTR	53.7268	86.5921	26.914	88.3684	80.5806
MLT1K	ERVL-MaLR	LTR	52.0676	80.9402	22.3809	86.5123	80.8363
MLT1K-int	ERVL-MaLR	LTR	45.9984	89.1796	23.8491	87.116	77.9861
MLT1L	ERVL-MaLR	LTR	53.4926	84.2361	23.9946	87.4369	80.6243
MLT1L-int	ERVL-MaLR	LTR	52.8572	84.3513	23.9946	84.5429	79.4748
MLT1M	ERVL-MaLR	LTR	53.6726	83.3726	24.4689	86.6658	80.1141
MLT1N2	ERVL-MaLR	LTR	48.5301	85.9728	23.1201	86.4588	80.5189
MLT-int	ERVL-MaLR	LTR	51.2577	84.9502	26.1294	86.02	81.4529
MSTA	ERVL-MaLR	LTR	59.7841	84.1325	31.7725	86.6393	77.8586
MSTA-int	ERVL-MaLR	LTR	75.6239	82.4654	41.7739	83.5329	79.6436
MSTB	ERVL-MaLR	LTR	60.475	87.5883	29.2047	86.9947	81.9952
MSTB1	ERVL-MaLR	LTR	58.5541	86.0088	27.8319	84.0837	77.8225
MSTB1-int	ERVL-MaLR	LTR	61.4826	87.5527	31.6342	86.116	81.429
MSTB2	ERVL-MaLR	LTR	61.0998	87.9979	29.6771	86.5089	80.7732
MSTB-int	ERVL-MaLR	LTR	70.3097	86.8151	34.3308	84.082	79.7668
MSTC	ERVL-MaLR	LTR	56.3495	88.0424	25.2124	87.1762	82.0582
MSTC-int	ERVL-MaLR	LTR	56.3808	90.0046	28.9501	87.3567	83.6178
MSTD	ERVL-MaLR	LTR	59.7526	88.3649	27.7981	87.414	82.4192
MSTD-int	ERVL-MaLR	LTR	60.1632	89.5486	29.5001	87.7497	83.0864
MST-int	ERVL-MaLR	LTR	60.8254	77.1996	29.893	81.2272	79.5095
THE1A	ERVL-MaLR	LTR	62.7847	82.4412	37.2111	87.5771	81.6835
THE1A-int	ERVL-MaLR	LTR	70.3597	88.7365	43.4786	88.0341	83.153
THE1B	ERVL-MaLR	LTR	64.0431	85.05	35.9591	87.3008	83.0364
THE1B-int	ERVL-MaLR	LTR	77.4491	86.7325	48.2685	87.3761	81.9479
THE1C	ERVL-MaLR	LTR	58.1671	81.4472	35.8881	86.4593	76.4035
THE1C-int	ERVL-MaLR	LTR	75.8612	83.9781	48.5974	86.4591	80.4243
THE1D	ERVL-MaLR	LTR	55.1288	82.7994	32.3306	86.035	77.0874
THE1D-int	ERVL-MaLR	LTR	75.2846	86.3107	47.1974	86.2298	80.9098
THE1-int	ERVL-MaLR	LTR	62.3518	75.6396	32.1295	82.5923	79.6445
LTR81	Gypsy	LTR	48.4533	86.247	23.1596	86.6102	78.7998
LTR81A	Gypsy	LTR	50.5228	85.4689	23.8187	87.0381	79.5653
LTR81AB	Gypsy	LTR	45.6762	91.0606	21.1911	86.304	80.5452
LTR81B	Gypsy	LTR	53.9755	85.7718	25.0863	86.6421	80.2378
LTR81C	Gypsy	LTR	52.7079	86.5632	24.3356	86.8828	80.6562
MamGyp-int	Gypsy	LTR	39.2068	64.047	16.6733	78.9398	70.8533
MamGypLTR1a	Gypsy	LTR	49.9581	87.3418	23.9517	86.4372	79.2568
MamGypLTR1b	Gypsy	LTR	49.9899	87.6323	23.4786	86.4556	78.8424
MamGypLTR1c	Gypsy	LTR	49.9633	85.8767	23.7246	86.0253	79.7631
MamGypLTR1d	Gypsy	LTR	48.4845	87.1227	21.9102	85.9853	76.3704
MamGypLTR2b	Gypsy	LTR	49.9006	84.885	24.3097	85.7891	80.0389
MamGypLTR2c	Gypsy	LTR	47.4425	86.1267	22.4891	86.1784	79.6461
MamGypLTR3	Gypsy	LTR	46.542	75.5882	21.4094	72.3325	67.8606
LTR85a	Gypsy?	LTR	52.1976	86.3803	23.5161	85.8626	80.0805
LTR85b	Gypsy?	LTR	51.651	84.566	24.2876	85.4637	79.6854
LTR85c	Gypsy?	LTR	49.4634	85.0946	22.5328	83.5932	77.0936
LTR88a	Gypsy?	LTR	50.6598	87.1748	24.6849	84.739	79.2395
LTR88b	Gypsy?	LTR	50.1289	85.4383	23.1306	85.5131	81.036
LTR88c	Gypsy?	LTR	45.7361	85.0852	23.2154	86.6776	82.5737
LTR90A	LTR	LTR	57.6401	87.9665	26.8616	87.8691	83.6047
LTR90B	LTR	LTR	57.8015	89.0337	26.2138	87.6183	80.3071
MamRep1527	LTR	LTR	52.4364	86.5013	25.4137	88.1546	81.1104
ALR/Alpha	centr	Satellite	80.5811	37.5663	37.281	67.3159	67.0242
GSATII	centr	Satellite	34.6737	8.61569	12.7781	77.8954	70.572
SST1	centr	Satellite	50.5131	12.6524	7.36118	80.6087	70.2899
(CATTC)n	Satellite	Satellite	26.6568	33.9671	25.5213	62.7312	71.1578
(GAATG)n	Satellite	Satellite	44.2576	29.8213	22.6028	62.0909	72.7193
BSR/Beta	Satellite	Satellite	39.4408	80.6429	25.7835	70.5266	74.0624
D20S16	Satellite	Satellite	47.3506	88.9487	25.5081	86.7167	80.2664
HSAT5	Satellite	Satellite	38.5796	70.0192	25.175	76.0262	80.7813
HSATII	Satellite	Satellite	47.4984	30.4197	23.6662	72.8976	73.2471
MSR1	Satellite	Satellite	37.3555	44.2759	6.15466	56.2239	46.8152
SATR1	Satellite	Satellite	35.2698	25.1579	14.1267	87.0883	84.0809
SATR2	Satellite	Satellite	40.5894	54.5058	21.9303	87.3331	86.524
REP522	telo	Satellite	55.7936	27.5072	15.1461	79.5542	80.1954
TAR1	telo	Satellite	21.3185	10.1153	5.75659	71.2534	69.5614
AluJb	Alu	SINE	62.0809	87.9055	29.1392	88.7949	87.2439
AluJo	Alu	SINE	61.7775	87.7402	28.5221	88.4987	86.6563
AluJr	Alu	SINE	61.7911	88.1452	29.4913	88.4256	86.4778
AluJr4	Alu	SINE	65.0201	89.8937	31.7743	88.9387	87.0536
AluSc	Alu	SINE	61.1871	84.1441	32.3631	89.977	89.2691
AluSc5	Alu	SINE	59.9051	84.8881	30.9577	90.0903	88.8691
AluSc8	Alu	SINE	59.5527	82.7057	30.8363	89.6305	89.2602
AluSg	Alu	SINE	60.2885	85.8408	33.3786	89.5172	88.8016
AluSg4	Alu	SINE	59.8236	85.7564	33.3346	89.3333	88.9893
AluSg7	Alu	SINE	60.3415	85.3949	32.7845	89.3077	88.2997
AluSp	Alu	SINE	59.7057	84.9535	33.0441	89.823	89.0615
AluSq	Alu	SINE	59.6932	86.1379	30.8641	89.3262	88.3094
AluSq10	Alu	SINE	58.1753	85.3552	31.3264	88.9036	88.3915
AluSq2	Alu	SINE	59.2146	86.426	31.2555	89.4085	88.4503
AluSq4	Alu	SINE	61.6675	83.2835	33.9264	89.3917	88.3691
AluSx	Alu	SINE	60.0179	86.5878	30.591	89.5234	88.6666
AluSx1	Alu	SINE	59.0417	86.315	30.1747	89.1673	88.37
AluSx3	Alu	SINE	61.2668	85.3929	33.0992	89.4269	89.0684
AluSx4	Alu	SINE	63.3425	86.4222	34.6031	89.4649	89.0709
AluSz	Alu	SINE	60.8025	87.8042	30.6309	89.6082	88.4707
AluSz6	Alu	SINE	63.6353	89.5057	31.4443	89.7568	88.7433
AluY	Alu	SINE	60.0536	66.9909	31.8141	89.5528	90.0032
AluYa5	Alu	SINE	61.0848	41.5261	34.4068	87.47	92.2203
AluYa8	Alu	SINE	61.5039	55.1492	33.8228	86.3677	90.4876
AluYb8	Alu	SINE	63.4083	51.9946	36.1196	90.1036	91.4567
AluYb9	Alu	SINE	60.5659	50.837	34.1309	90.9054	91.7126
AluYc	Alu	SINE	59.4459	62.364	31.7539	88.9573	89.44
AluYc3	Alu	SINE	58.9505	54.1426	31.5877	89.2078	90.8285
AluYd8	Alu	SINE	54.8362	29.6533	30.1728	89.4087	92.1172
AluYf4	Alu	SINE	58.9697	50.3965	31.8434	89.1457	90.541
AluYf5	Alu	SINE	56.3217	51.6512	30.4222	89.9372	91.178
AluYg6	Alu	SINE	64.5265	49.1733	35.1193	88.5271	91.4279
AluYh9	Alu	SINE	58.0232	69.2349	28.6013	86.2931	87.114
AluYk11	Alu	SINE	62.8867	68.8387	30.6752	88.9455	88.5607
AluYk12	Alu	SINE	60.8248	66.1108	35.032	89.4916	90.7281
AluYk4	Alu	SINE	59.2866	56.1903	32.1905	89.6116	90.8023
FAM	Alu	SINE	65.5817	88.5119	31.1554	88.9503	87.1997
FLAM_A	Alu	SINE	62.6674	87.0387	29.9521	87.7977	85.8603
FLAM_C	Alu	SINE	60.3312	85.4422	28.4011	87.2528	86.0761
FRAM	Alu	SINE	56.9265	83.8234	26.5032	86.9769	84.0232
AmnSINE1	Deu	SINE	50.3505	80.7071	23.2883	81.8504	71.3718
AmnSINE2	Deu	SINE	51.7599	84.2017	28.3953	84.7757	80.0838
MIR	MIR	SINE	54.3795	84.2851	23.8356	86.3366	80.0859
MIR3	MIR	SINE	50.8729	82.272	21.2473	82.8698	75.6943
MIRb	MIR	SINE	53.1602	84.2794	22.8967	85.5731	78.9636
MIRc	MIR	SINE	52.5078	83.4698	22.4774	84.5258	77.6252
LFSINE_Vert	SINE	SINE	56.0915	84.8037	26.104	85.8191	79.8407
MamSINE1	tRNA	SINE	58.2287	86.436	26.7113	86.0558	80.466
SVA_A	SVA	SVA	78.5266	76.9684	59.1924	90.1879	90.2684
SVA_B	SVA	SVA	69.3315	51.2551	39.1634	91.2657	91.6514
SVA_C	SVA	SVA	68.495	60.8182	42.5079	90.6076	90.759
SVA_D	SVA	SVA	60.9303	53.8418	37.1654	91.3168	90.3469
SVA_E	SVA	SVA	63.3968	38.4447	29.6926	89.6174	89.2819
SVA_F	SVA	SVA	67.5112	55.6556	38.6727	90.69	89.466
